# Supplementary material for: Dynamic Imaging of CD8+ T Cells and Dendritic Cells during Infection with Toxoplasma gondii
Source: PubMed Central journal article supplement (PMC2700268; doi:10.1371/journal.ppat.1000505), 2009-07-03

**A**

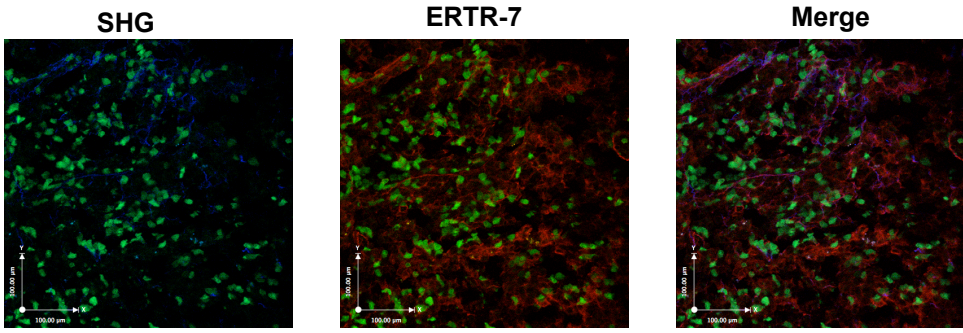

**B**

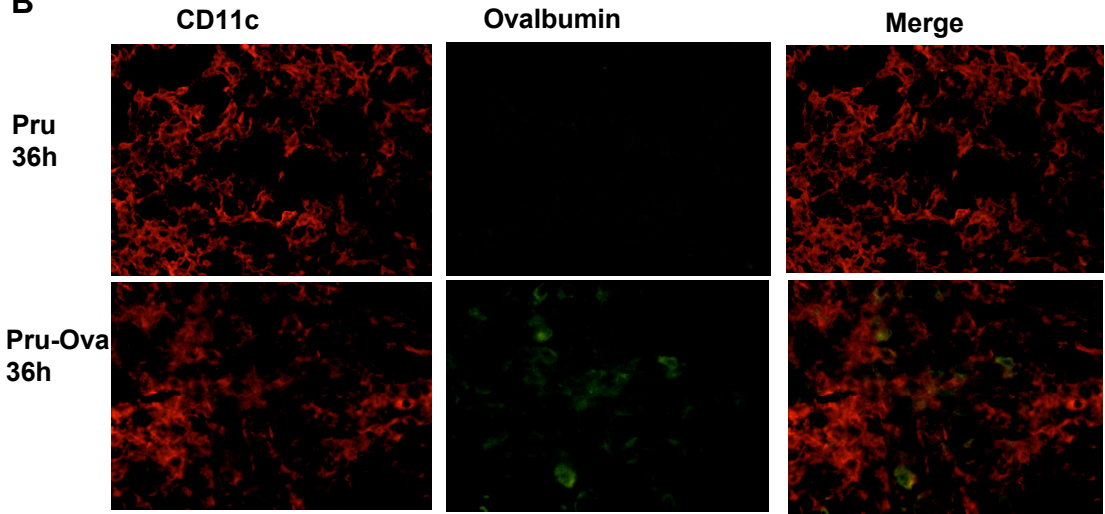

Supplement: ppat.1000505.s002.pdf [file ppat.1000505.s002.pdf]
