# Supplementary material for: Dynamic Imaging of CD8+ T Cells and Dendritic Cells during Infection with Toxoplasma gondii
Source: PubMed Central journal article supplement (PMC2700268; doi:10.1371/journal.ppat.1000505), 2009-07-03

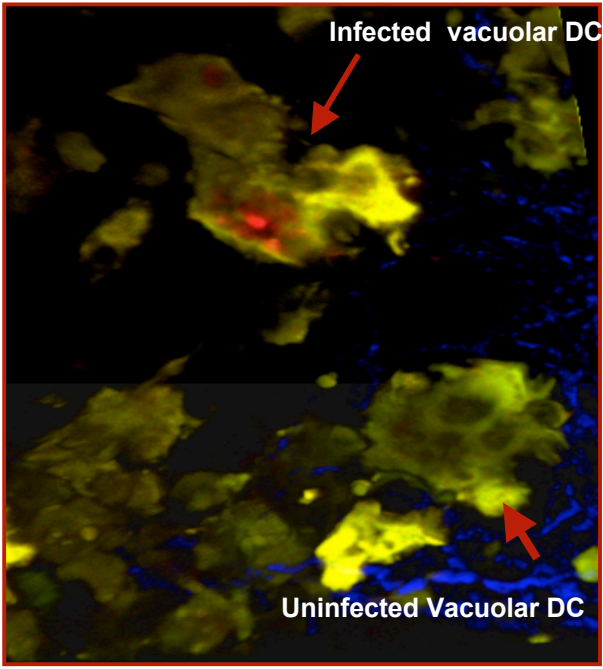

Supplement: ppat.1000505.s003.pdf [file ppat.1000505.s003.pdf]
